# Supplementary material for: PMA-Induced THP-1 Macrophage Differentiation is Not Impaired by Citrate-Coated Platinum Nanoparticles
Source: MDPI journal article supplement (doi:10.3390/nano7100332), 2017-10-17
Supplement: s1 [file s1]

# PMA-Induced THP-1 Macrophage Differentiation is Not Impaired by Citrate-Coated Platinum Nanoparticles

Francesca Gatto <sup>1,2</sup>, Roberta Cagliani <sup>1,3</sup>, Tiziano Catelani <sup>4</sup>, Daniela Guarnieri <sup>1</sup>, Mauro Moglianetti <sup>5</sup>, Pier Paolo Pompa <sup>1</sup> and Giuseppe Bardi <sup>1,\*</sup>

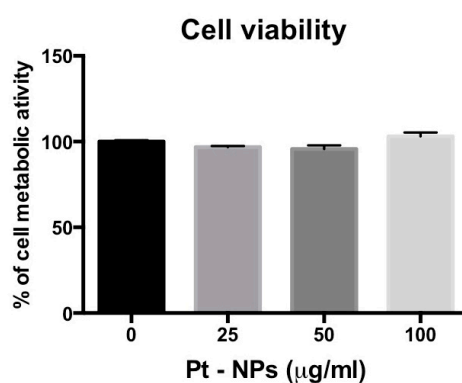

**Figure S1.** WST-8 assay of HeLa cells treated with increasing concentration of PtNPs for 24h.

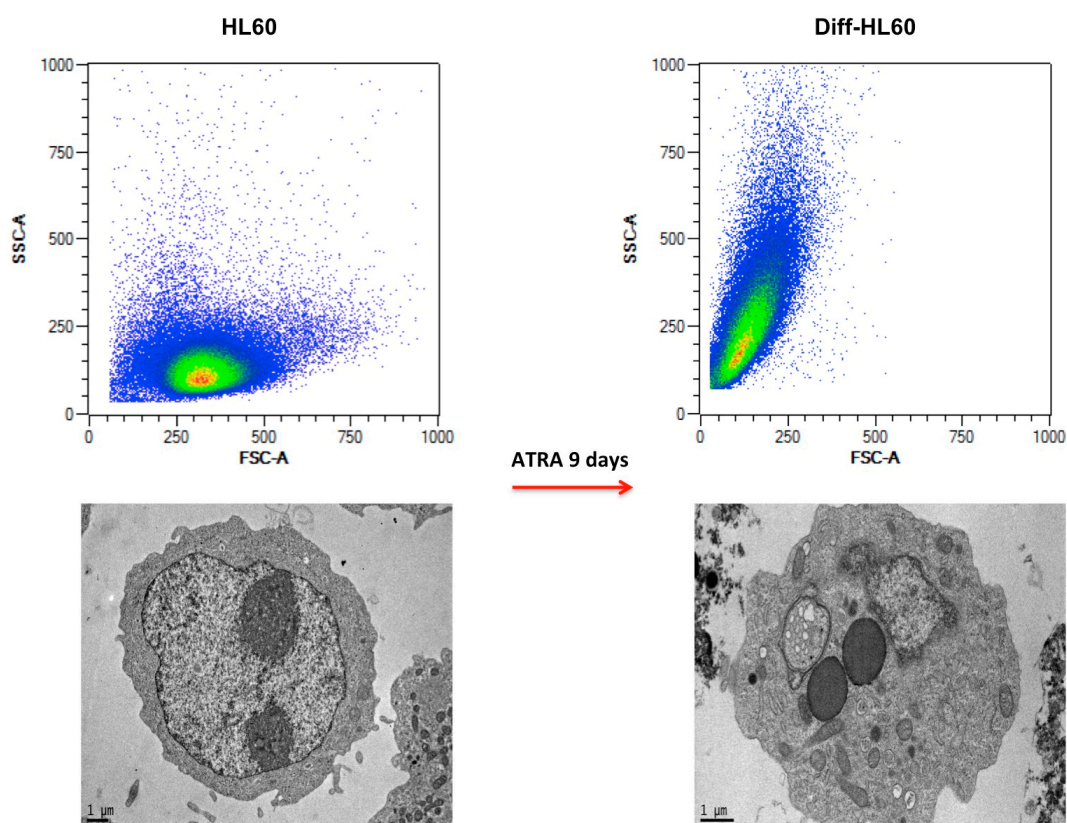

**Figure S2.** Flow cytometer dot plots and TEM images of internalized undifferentiated and differentiated HL60.

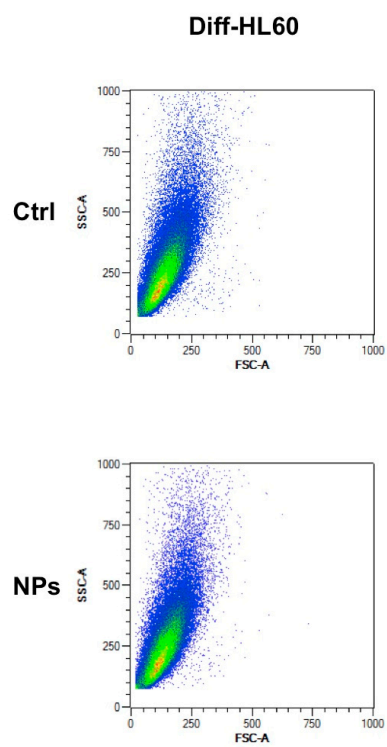

**Figure S3.** Dot plots show the comparison between untreated and PtNP-treated differentiated HL60 for 24h.
